# Supplementary material for: Bio-based PBT copolyesters derived fromd-glucose: influence of composition on properties
Source: Royal Society of Chemistry journal article supplement (doi:10.1039/c3py01425h), 2013-11-19
Supplement: c3py01425h.pdf [file c3py01425h.pdf]

# Electronic Supplementary Information

## Bio-based PBT copolyesters derived from D-glucose: influence of composition on properties

Cristina Japu,<sup>a</sup> Antxon Martínez de Ilarduya,<sup>a</sup> Abdelilah Alla,<sup>a</sup>  
M<sup>a</sup> Gracia García-Martín,<sup>b</sup> Juan A. Galbis<sup>b</sup> and Sebastián Muñoz-Guerra<sup>a\*</sup>

<sup>a</sup>Universitat Politècnica de Catalunya, ETSEIB, Diagonal 647, 08028 Barcelona, Spain

<sup>b</sup>Universidad de Sevilla, Facultad de Farmacia, Francisco García González s/n, Sevilla, Spain

Corresponding author: [sebastian.munoz@upc.edu](mailto:sebastian.munoz@upc.edu)

**SI-Fig. 1.** <sup>1</sup>H-<sup>1</sup>H COSY NMR spectrum of PB<sub>69</sub>Glux<sub>31</sub>T copolyester.

**SI-Fig. 2.** <sup>1</sup>H-<sup>13</sup>C HETCOR NMR spectra of PB<sub>69</sub>Glux<sub>31</sub>T copolyester (top) amplified region and all (bottom).

**SI-Fig. 3.** <sup>1</sup>H (top) and <sup>13</sup>C (bottom) NMR spectra of PB<sub>69</sub>Glux<sub>31</sub>T copolyester.

**SI-Fig. 4.** <sup>1</sup>H-<sup>1</sup>H COSY NMR spectrum of PBT<sub>67</sub>Glux<sub>33</sub> copolyester.

**SI-Fig. 5.** <sup>1</sup>H-<sup>13</sup>C HETCOR NMR spectra of PBT<sub>67</sub>Glux<sub>33</sub> copolyester (top) all and (bottom) amplified region.

**SI-Fig. 6.** <sup>1</sup>H (top) and <sup>13</sup>C (bottom) NMR spectra of PBT<sub>67</sub>Glux<sub>33</sub> copolyester.

**SI-Fig. 7.** DSC traces of PB<sub>x</sub>Glux<sub>y</sub>T (a) and PBT<sub>x</sub>Glux<sub>y</sub> (b) copolyesters recorded at heating from quenched samples for *T<sub>g</sub>* observation.

**SI-Fig. 8.** Double logarithmic plots of the isothermal crystallization of PB<sub>97</sub>Glux<sub>3</sub>T, PB<sub>94</sub>Glux<sub>6</sub>T, PB<sub>89</sub>Glux<sub>11</sub>T, PBT<sub>95</sub>Glux<sub>5</sub>, PBT<sub>90</sub>Glux<sub>10</sub> copolyesters and PBT homopolyester at the indicated temperatures.

**SI-Fig. 9.** WAXS profiles of PB<sub>x</sub>Glux<sub>y</sub>T, PBT<sub>x</sub>Glux<sub>y</sub> copolymers and their parent homopolyesters recorded from powder samples without any previous thermal treatment.

**SI-Fig. 10.** Compared <sup>1</sup>H NMR after incubation (residue) with water at pH 2.0 at 80 °C and initial spectra of PB<sub>59</sub>Glux<sub>41</sub>T (a) and PBT<sub>55</sub>Glux<sub>45</sub> (b) copolyesters.

**SI-Fig. 11.** <sup>1</sup>H NMR spectra in D<sub>2</sub>O of the products released to the aqueous medium after incubation of PBT<sub>55</sub>Glux<sub>45</sub> at pH 2.0 at 80 °C for four weeks.

**SI-Table 1.** Powder X-ray diffraction data of polyesters.

**SI-Table 2.** Mechanical properties.

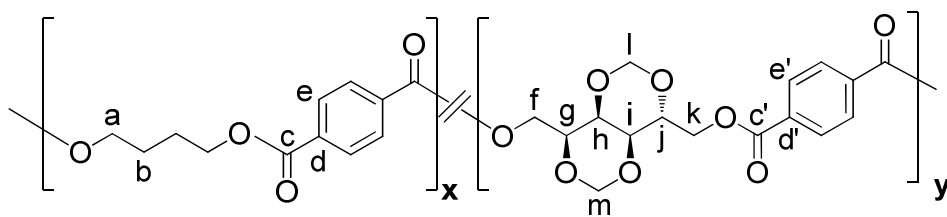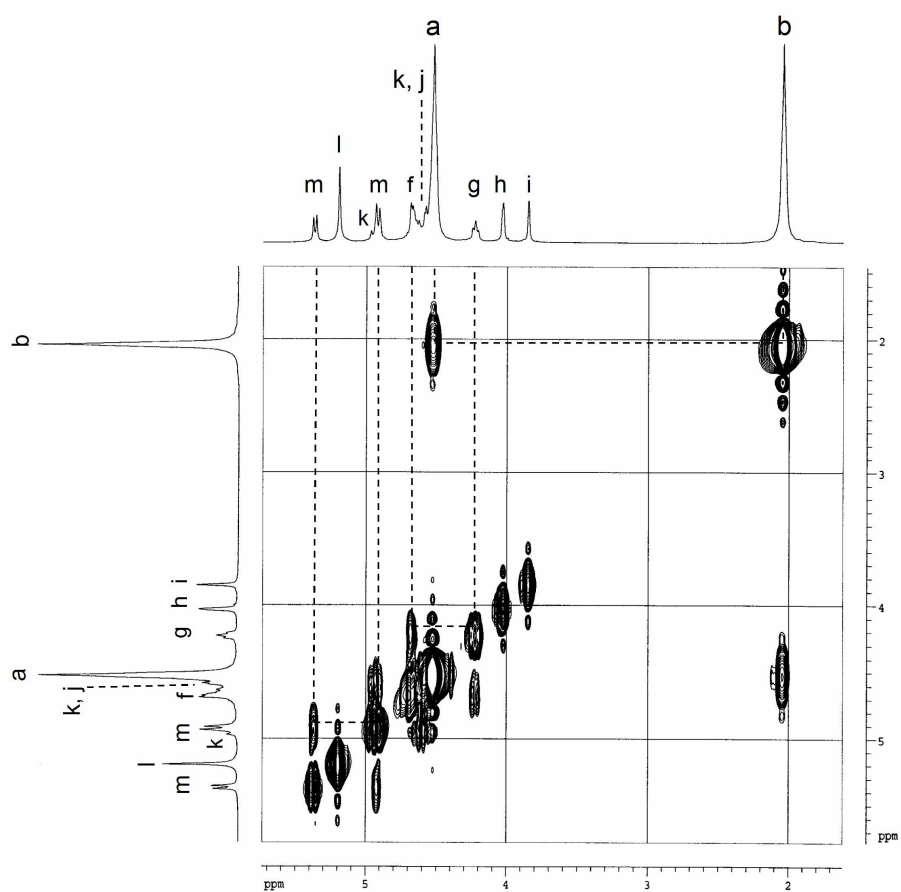

**SI-Fig. 1.** <sup>1</sup>H-<sup>1</sup>H COSY NMR spectrum of PB<sub>69</sub>Glux<sub>31</sub>T copolyester.

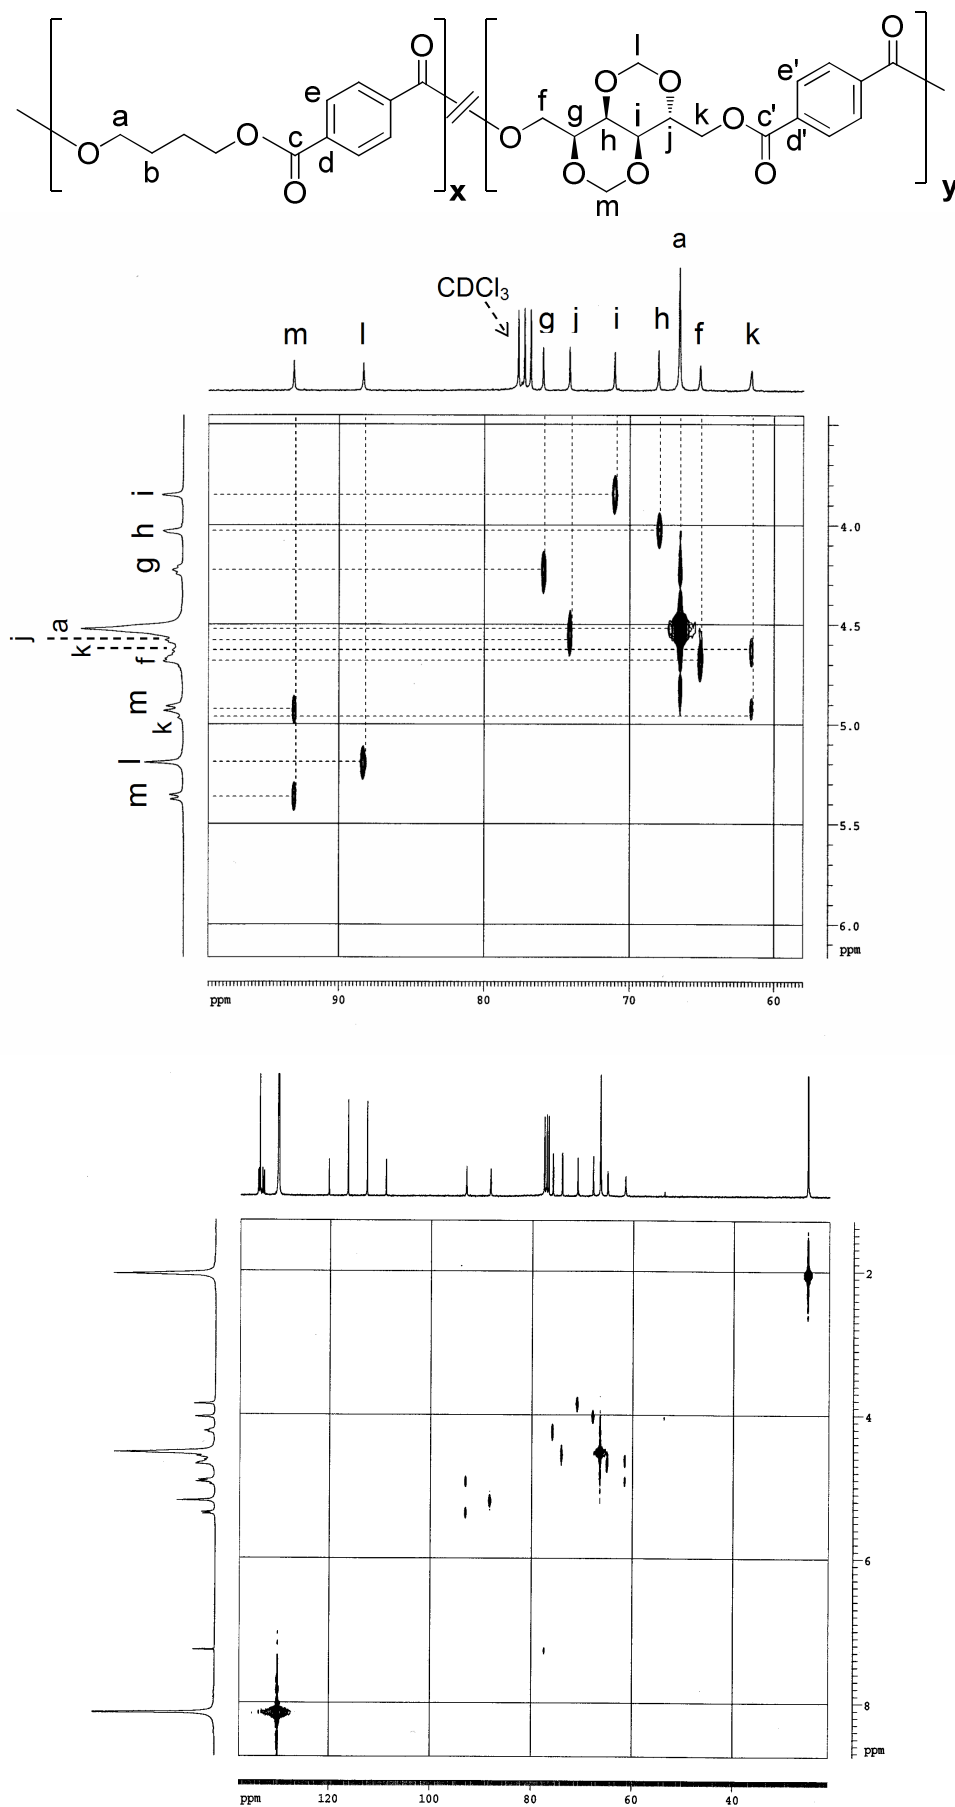

**SI-Fig. 2.** <sup>1</sup>H-<sup>13</sup>C HETCOR NMR spectrum of PB<sub>69</sub>Glux<sub>31</sub>T copolyester (bottom) and enlarged region (top).

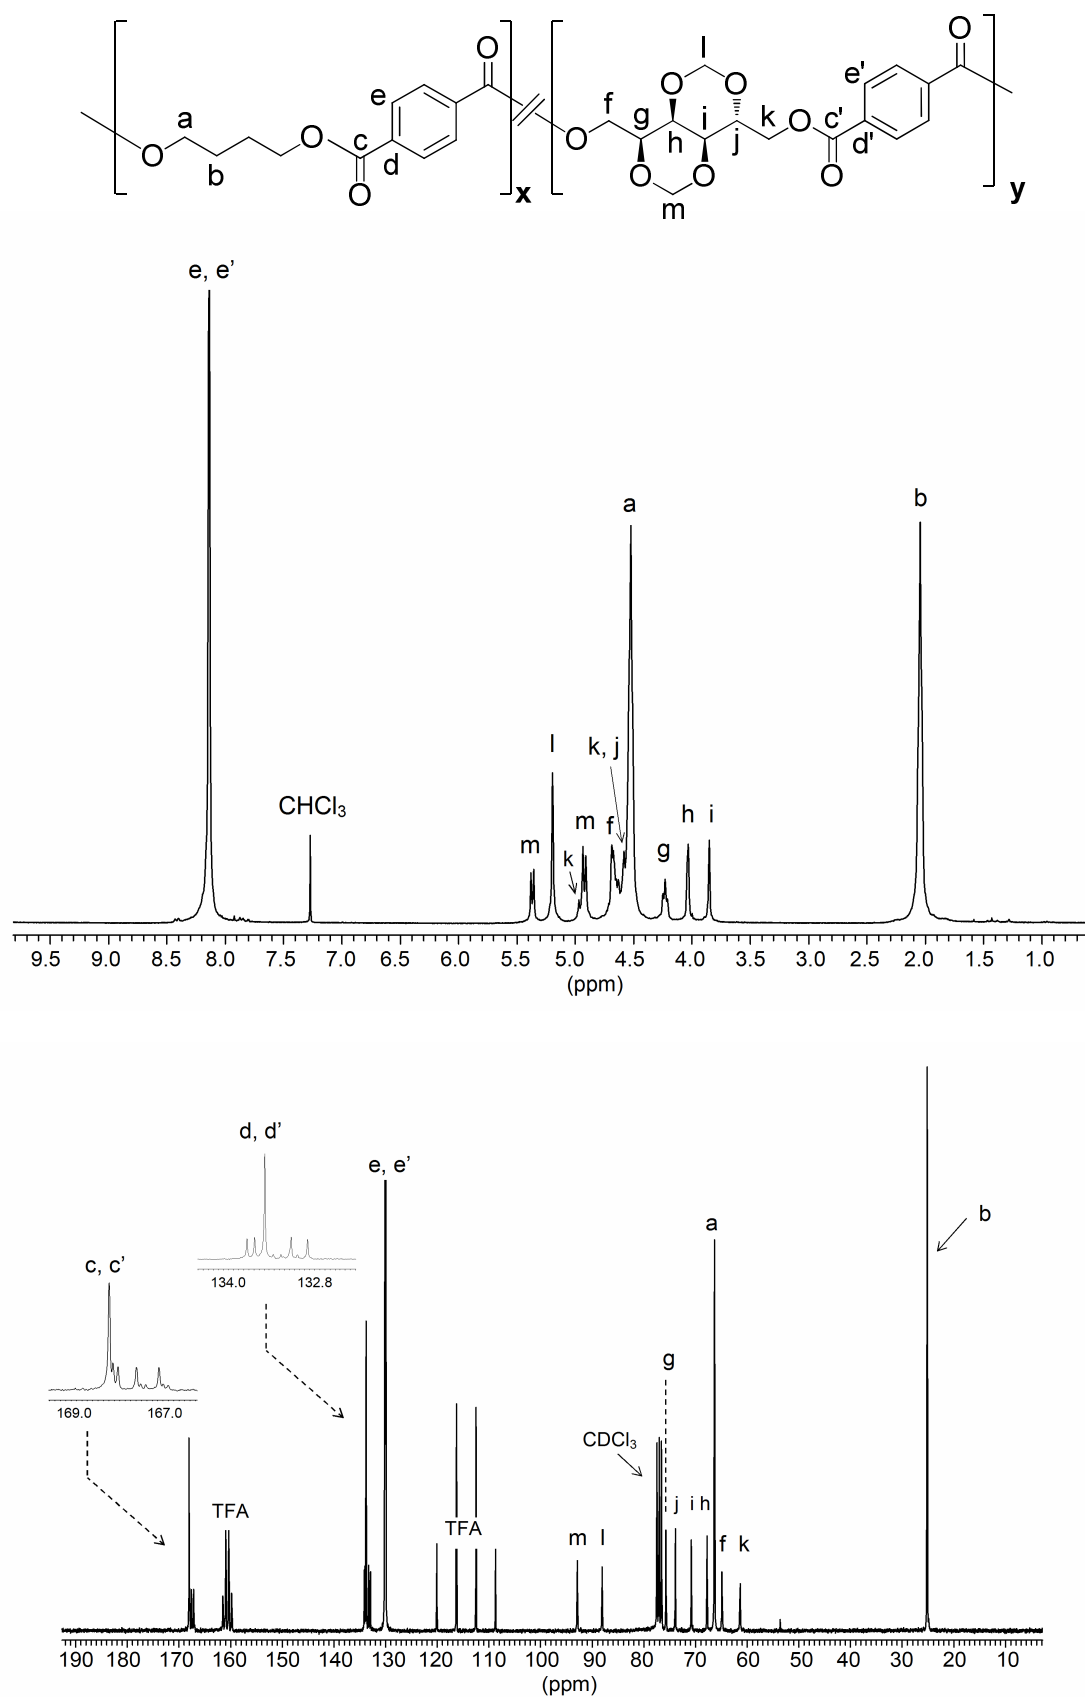

**SI-Fig. 3.** <sup>1</sup>H (top) and <sup>13</sup>C (bottom) NMR spectra of PB<sub>69</sub>Glux<sub>31</sub>T copolyester.

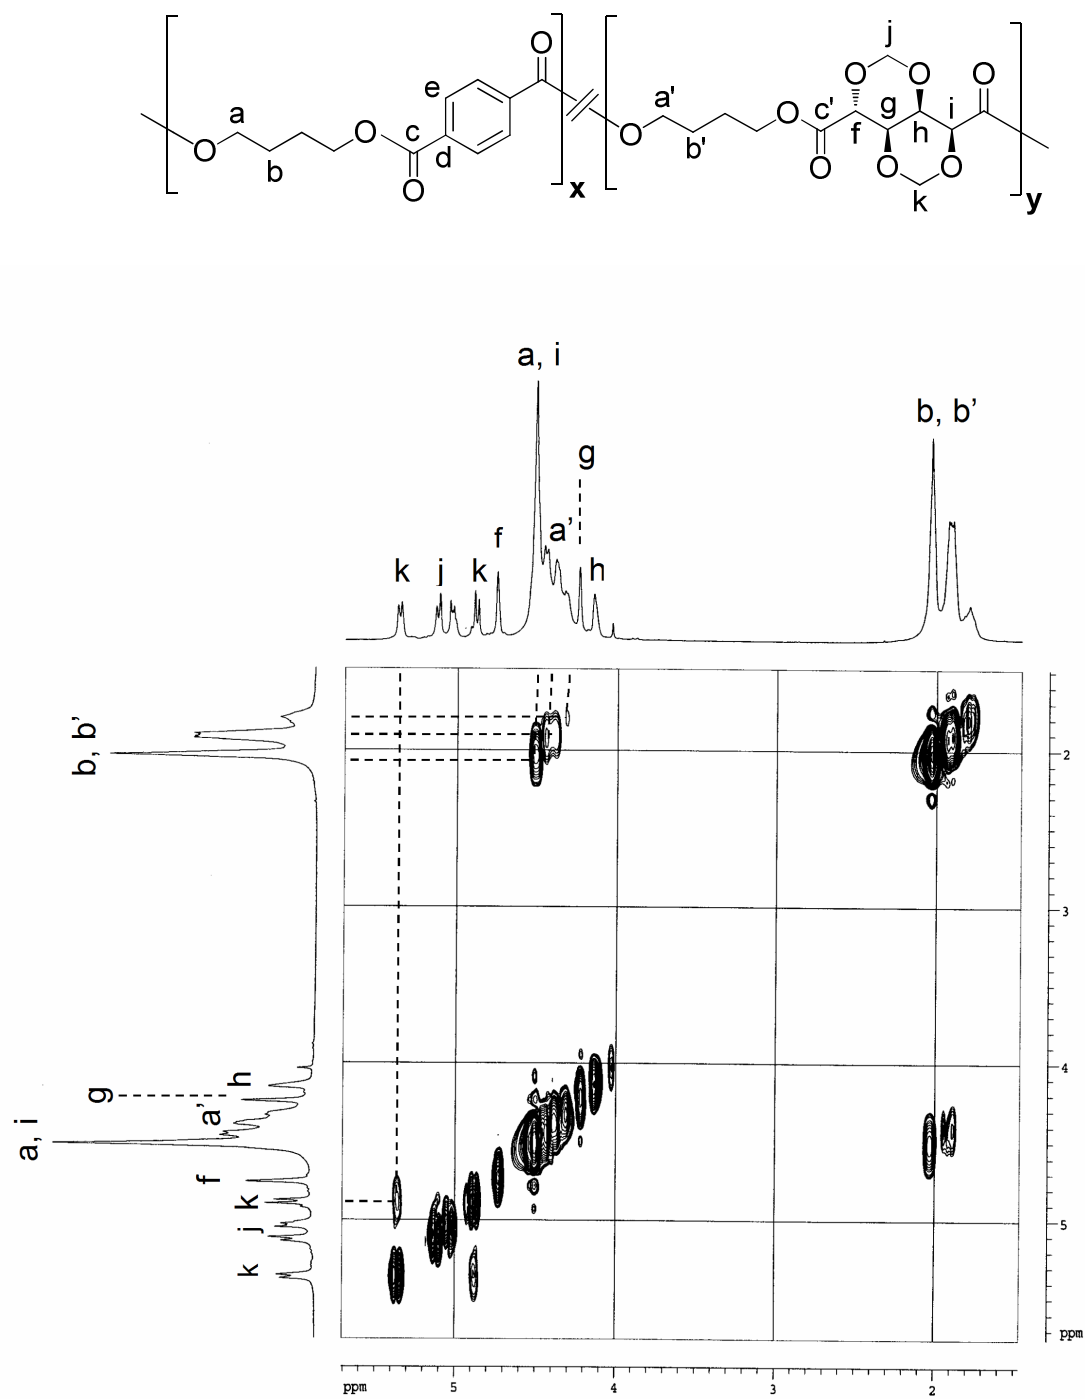

SI-Fig. 4. <sup>1</sup>H-<sup>1</sup>H COSY NMR spectrum of PBT<sub>67</sub>Glux<sub>33</sub> copolyester.

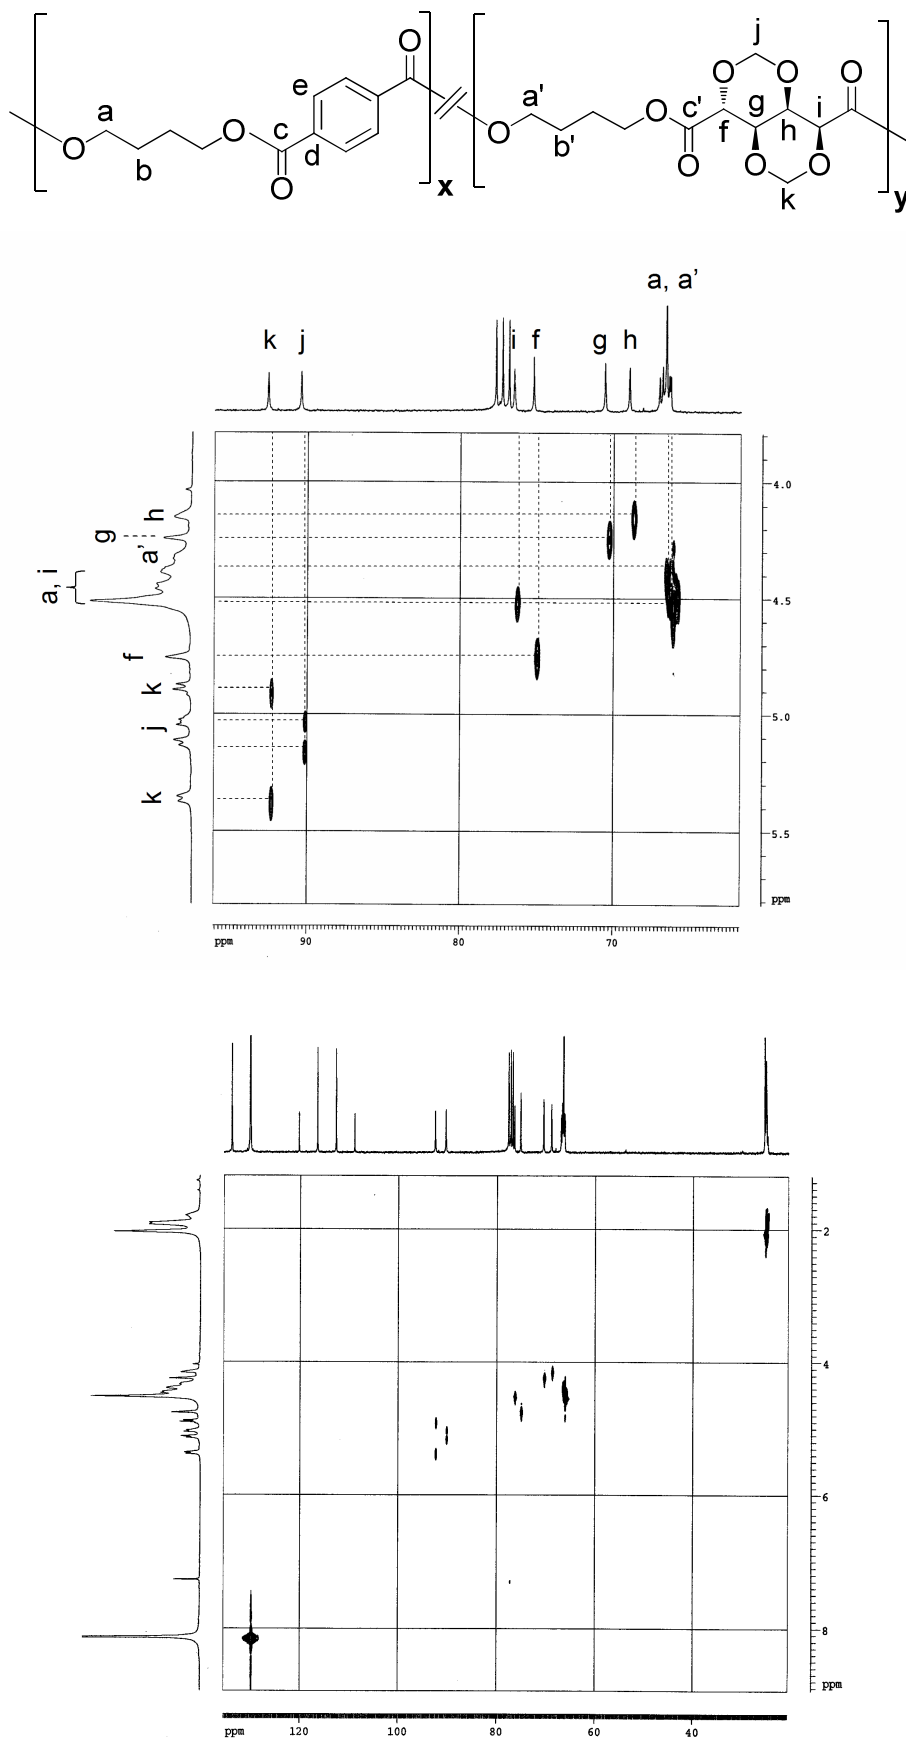

**SI-Fig. 5.** <sup>1</sup>H-<sup>13</sup>C HETCOR NMR spectrum of PBT<sub>67</sub>Glux<sub>33</sub> copolyester (top) and amplified region (bottom).

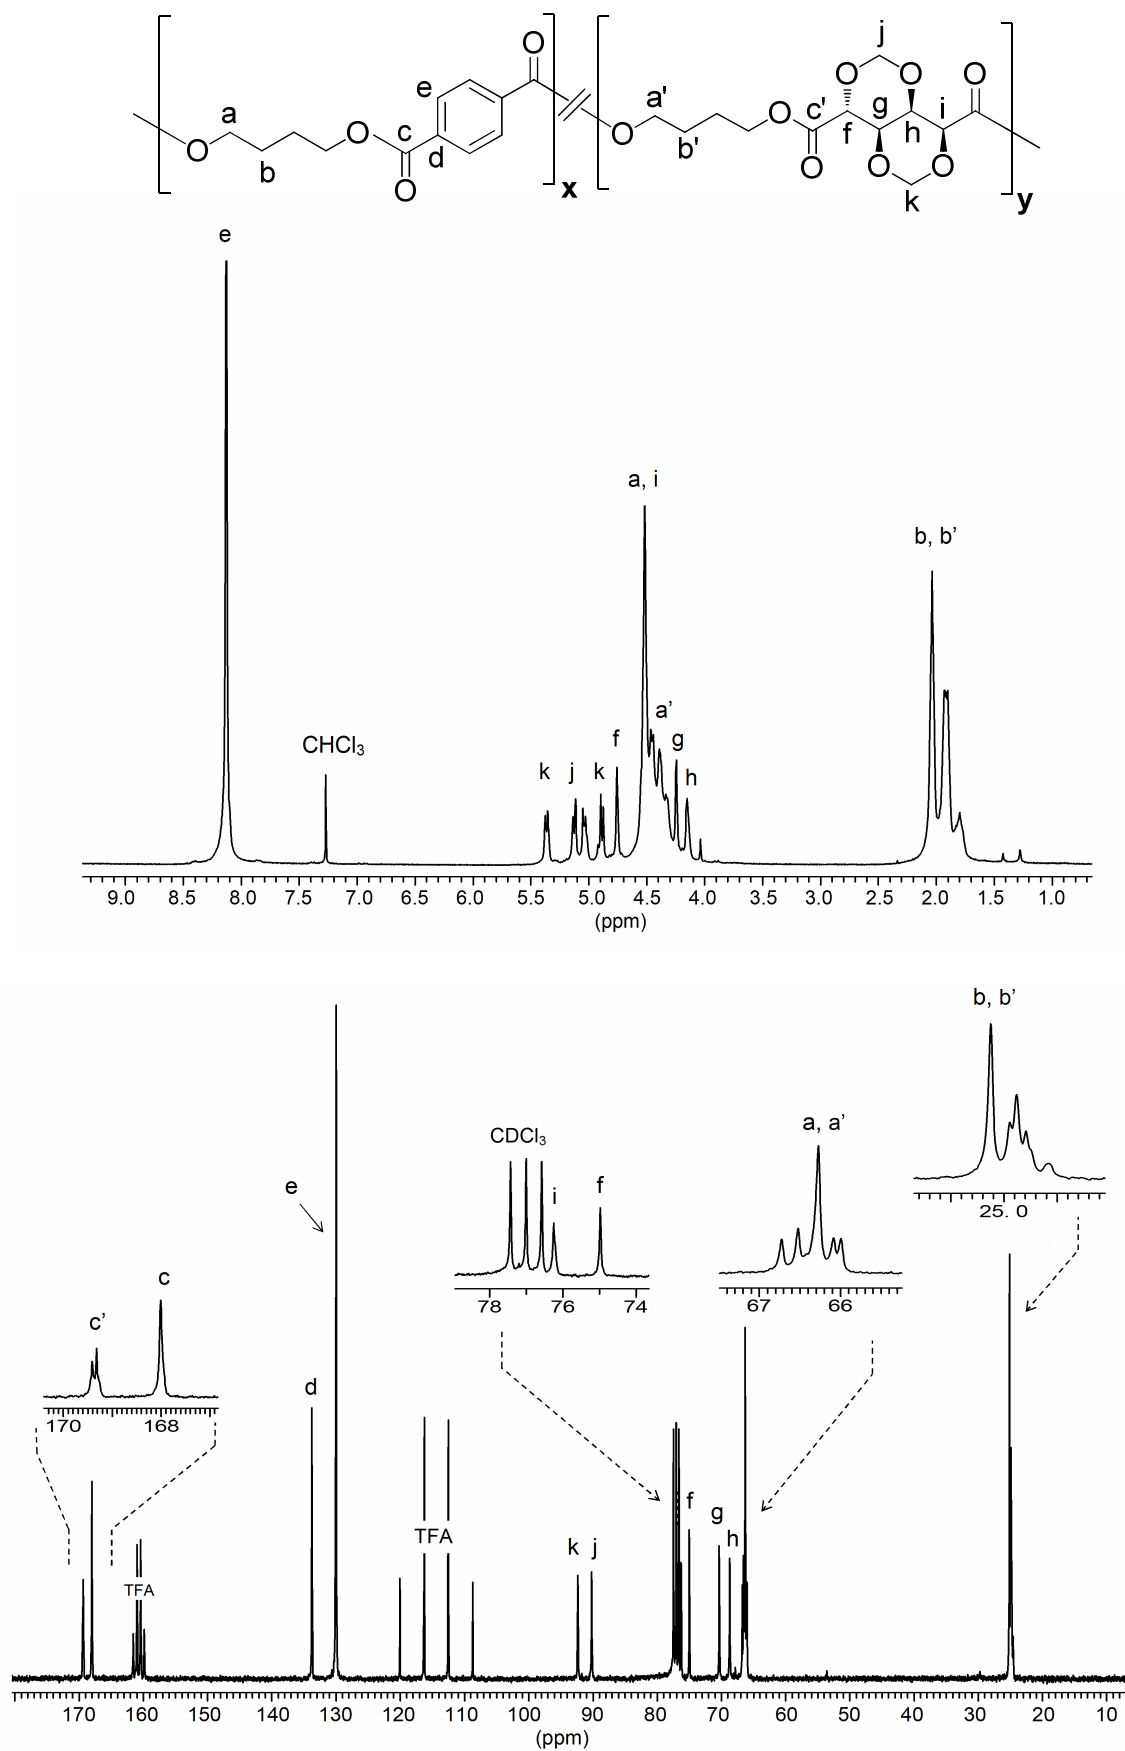

SI-Fig. 6. <sup>1</sup>H (top) and <sup>13</sup>C (bottom) NMR spectra of PBT<sub>67</sub>Glux<sub>33</sub> copolyester.

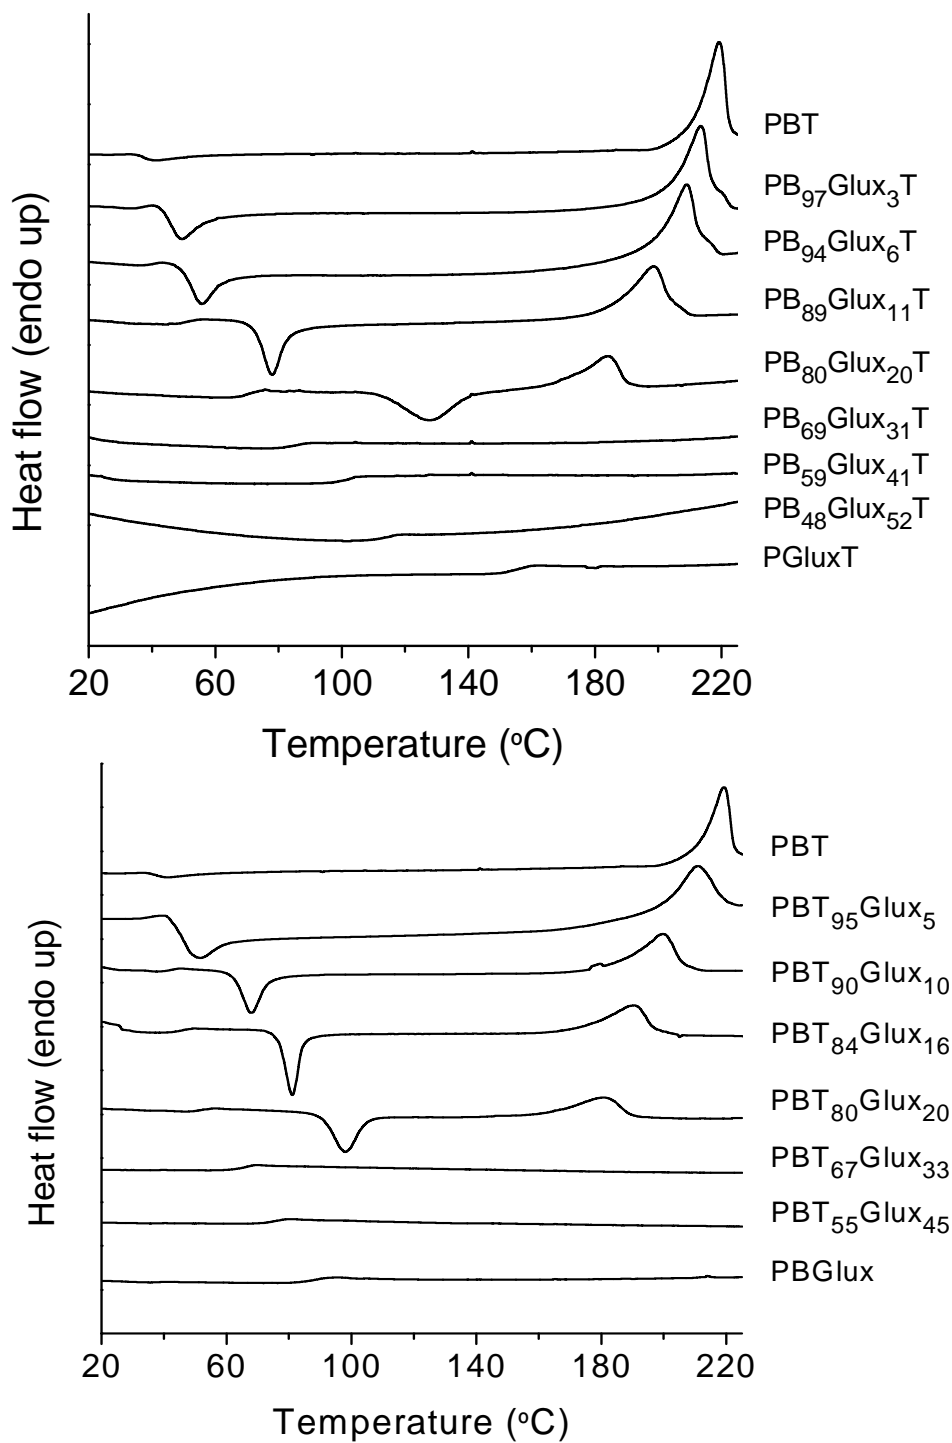

**SI-Fig. 7.** DSC traces of PB<sub>x</sub>Glux<sub>y</sub>T (a) and PBT<sub>x</sub>Glux<sub>y</sub> (b) copolyesters recorded at heating from quenched samples for T<sub>g</sub> observation.



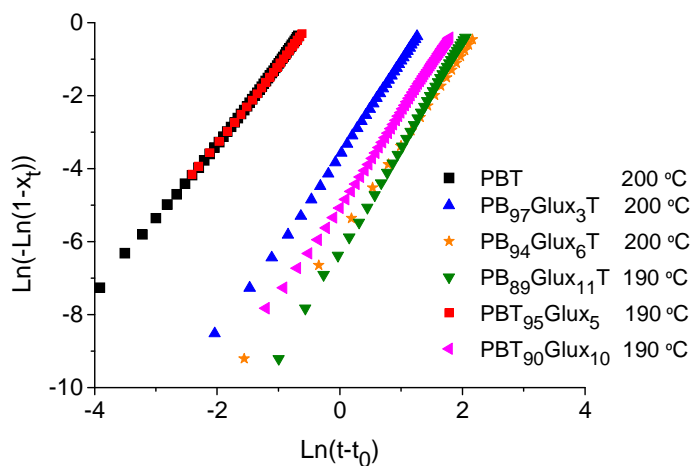

**SI-Fig. 8.** Double logarithmic plots of the isothermal crystallization of PB<sub>97</sub>Glux<sub>3</sub>T, PB<sub>94</sub>Glux<sub>6</sub>T, PB<sub>89</sub>Glux<sub>11</sub>T, PBT<sub>95</sub>Glux<sub>5</sub>, PBT<sub>90</sub>Glux<sub>10</sub> copolyesters and PBT homopolymer at the indicated temperatures.

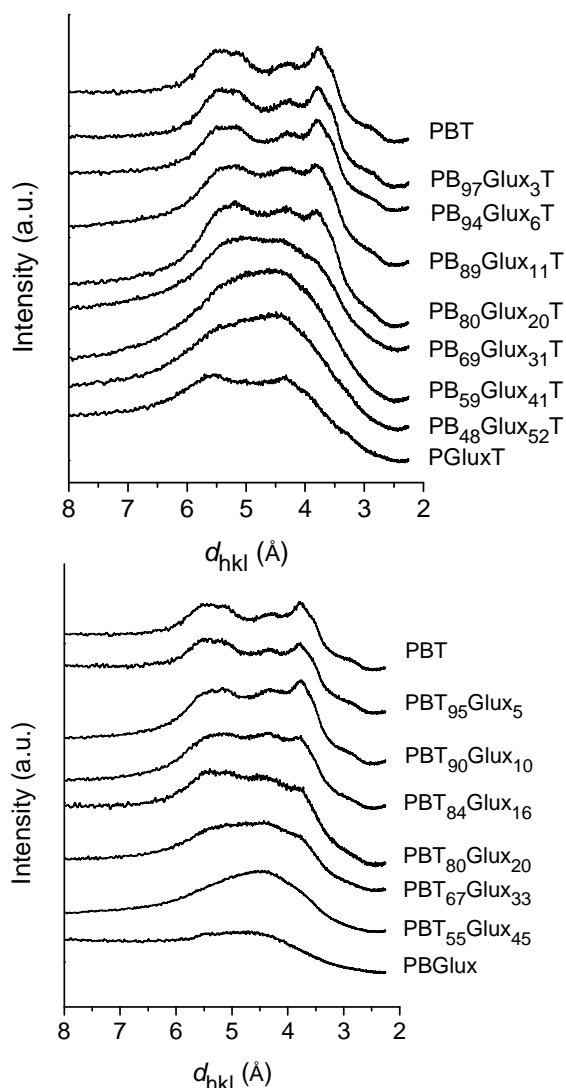

**SI-Fig. 9.** WAXS profiles of PB<sub>x</sub>Glux<sub>y</sub>T (top) PBT<sub>x</sub>Glux<sub>y</sub> (bottom) copolymers and their respective parent homopolymers recorded from powder samples without any previous thermal treatment.

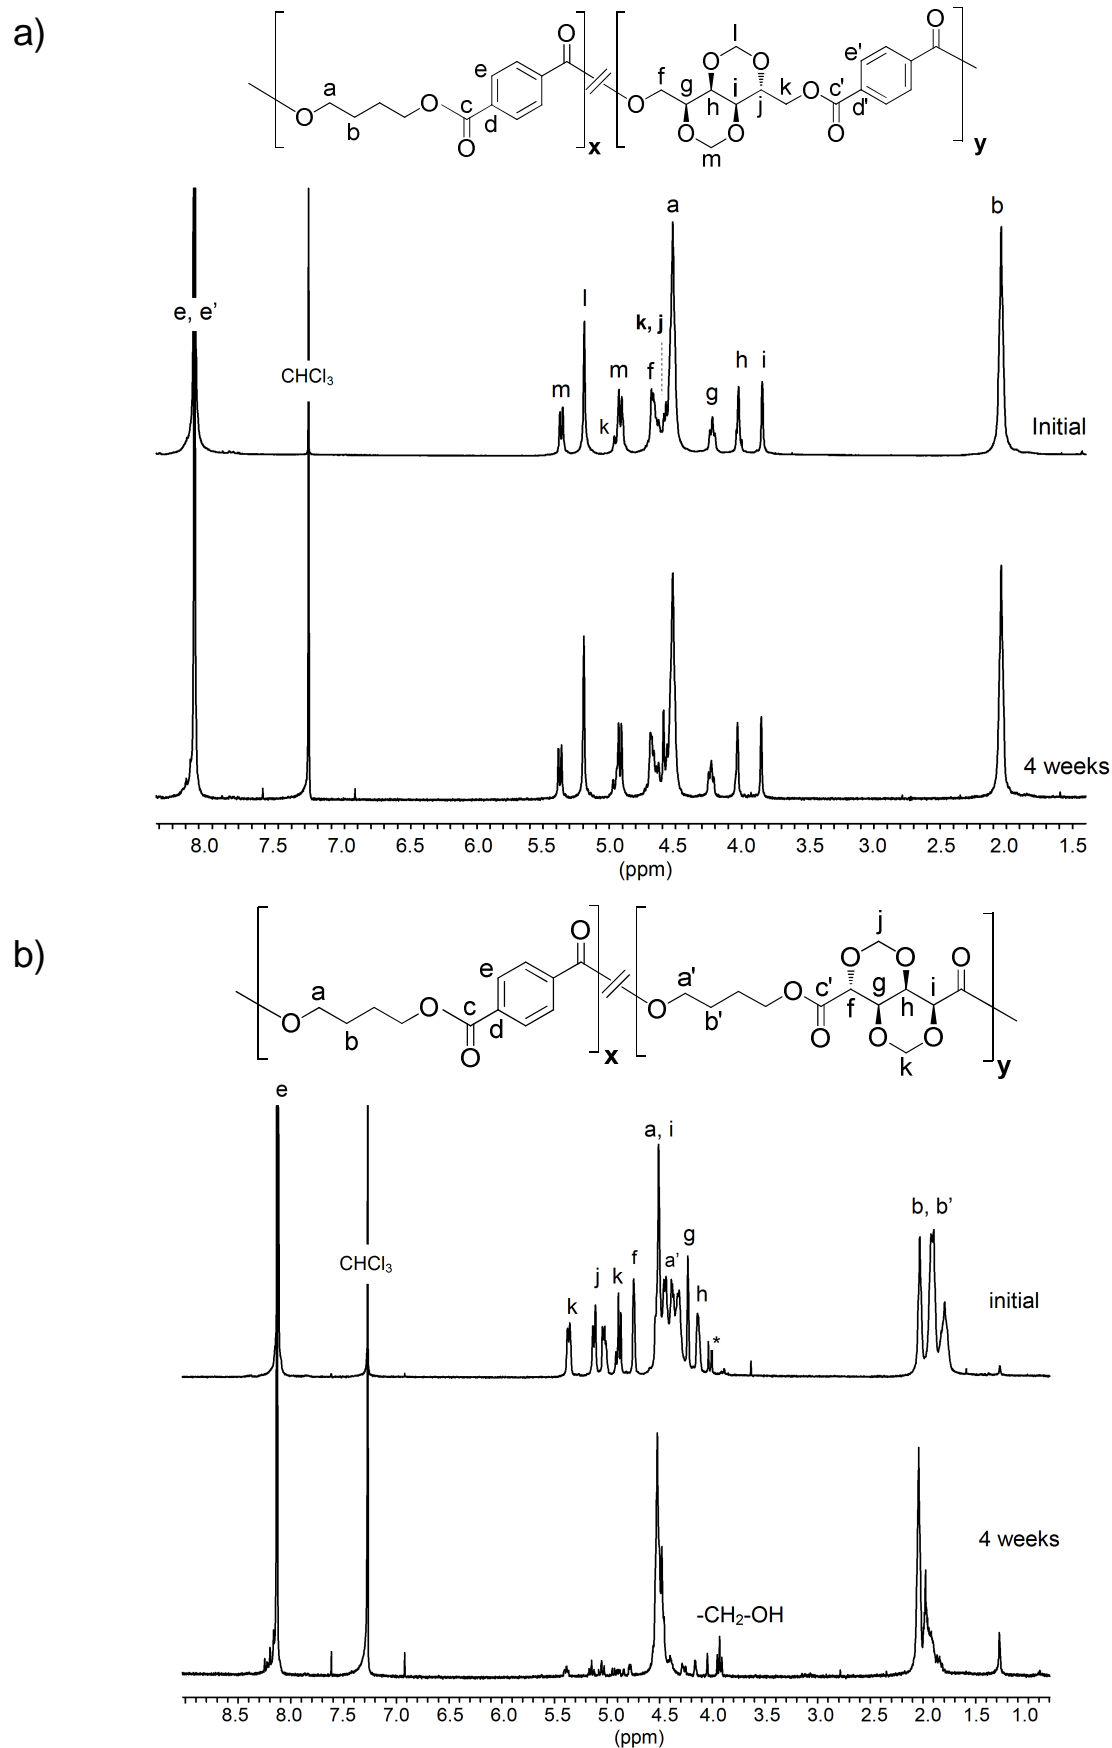

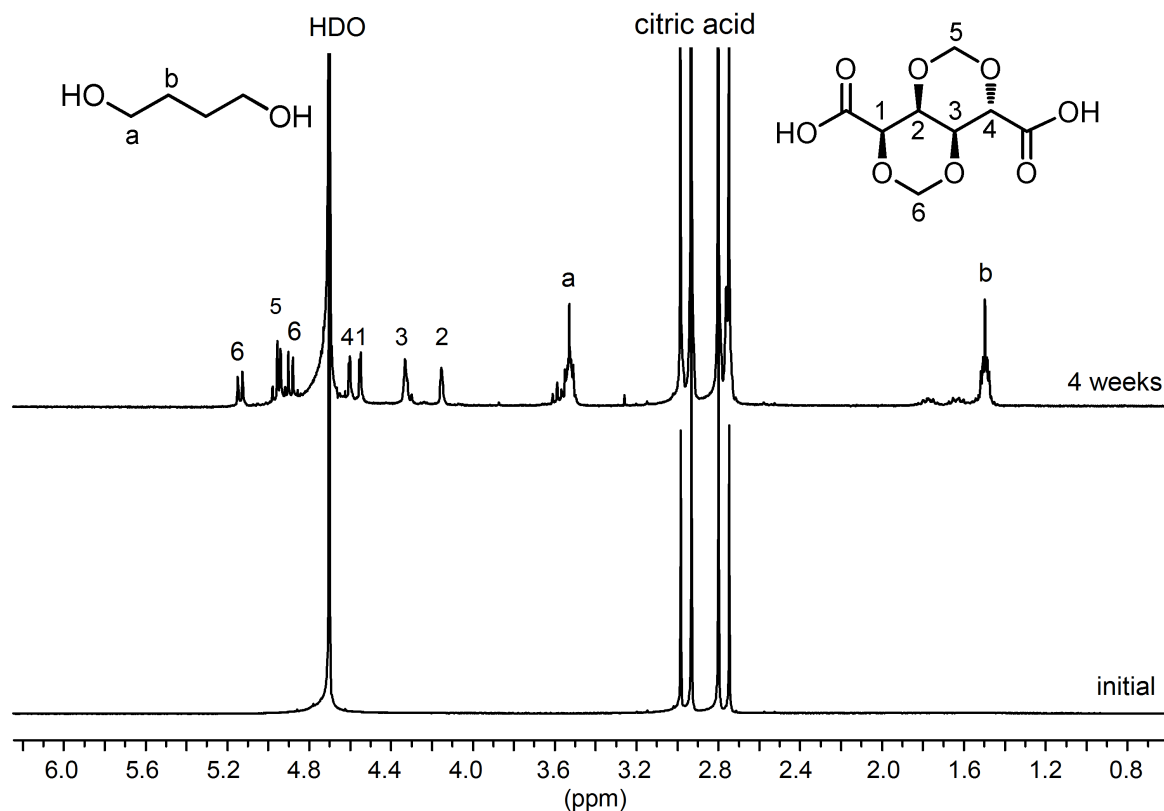

**SI-Fig.11.** <sup>1</sup>H NMR spectra in D<sub>2</sub>O of the products released to the aqueous medium by PBT<sub>55</sub>Glux<sub>45</sub> after incubation in water at pH 2.0 at 80 °C for four weeks.

**SI-Table 1.** Powder X-ray diffraction data of polyesters.

| Polyester                             | $d_{hkl}^a$ (Å) |        |         |        |        |        |         |        |        |        | $X_c^b$ |
|---------------------------------------|-----------------|--------|---------|--------|--------|--------|---------|--------|--------|--------|---------|
| PBT                                   | 5.50 s          | 5.13 s | 4.45 w  | 4.29 s | 3.95 m | 3.81 s | 3.69 w  | 3.52 s | 3.04 w | 2.84 m | 0.70    |
| PBT <sub>95</sub> Glux <sub>5</sub>   | 5.53 s          | 5.13 s | 4.46 vw | 4.29 s | 3.95 m | 3.82 s | 3.69 w  | 3.52 s | 3.04 w | 2.84 m | 0.66    |
| PBT <sub>90</sub> Glux <sub>10</sub>  | 5.53 s          | 5.13 s | -       | 4.31 s | 3.95 m | 3.82 s | 3.69 vw | 3.52 s | 3.04 w | 2.85 m | 0.60    |
| PB <sub>94</sub> Glux <sub>6</sub> T  | 5.50 s          | 5.13 s | 4.45 vw | 4.31 s | 3.95 m | 3.82 s | 3.69 w  | 3.52 s | 3.04 w | 2.85 m | 0.63    |
| PB <sub>89</sub> Glux <sub>11</sub> T | 5.50 s          | 5.13 s | -       | 4.31 s | 3.95 m | 3.82 s | 3.69 vw | 3.52 s | 3.04 w | 2.85 m | 0.49    |

<sup>a</sup>Bragg spacings measured in powder diffraction patterns obtained from annealed samples. Intensities visually estimated as follows: m, medium; s, strong; w, weak; vw, very weak.

<sup>b</sup>Crystallinity index calculated as the quotient between crystalline area and total area. Crystalline and amorphous areas in the X-ray diffraction pattern were quantified using PeakFit v4.12 software.

**SI-Table 2.** Mechanical properties.

| Polyester                             | Elastic modulus<br>(MPa) | Tensile strength<br>(MPa) | Elongation at break<br>(%) |
|---------------------------------------|--------------------------|---------------------------|----------------------------|
| PBT                                   | 863±25                   | 33±4                      | 15±4                       |
| PB <sub>69</sub> Glux <sub>31</sub> T | 885±17                   | 41±5                      | 79±9                       |
| PB <sub>59</sub> Glux <sub>41</sub> T | 892±22                   | 47±6                      | 105±16                     |
| PBT <sub>67</sub> Glux <sub>33</sub>  | 590±20                   | 27±5                      | 121±15                     |
| PBT <sub>55</sub> Glux <sub>45</sub>  | 582±15                   | 24±5                      | 131±18                     |
